1 *Type of the Paper: Virology*

2

3 **Rapid High Throughput Whole Genome Sequencing of SARS-CoV-2 by using One-step**  
4 **RT-PCR Amplification with Integrated Microfluidic System and Next-Gen Sequencing**

5 Tao Li<sup>1</sup>, Hye Kyung Chung<sup>1</sup>, Papa K. Pireku<sup>1</sup>, Brett F. Beitzel<sup>2</sup>, Mark A. Sanborn<sup>1</sup>, Cynthia Y.  
6 Tang<sup>3,4,5,6</sup>, Richard Hammer<sup>7</sup>, Detlef Ritter<sup>7</sup>, XiuFeng Wan<sup>3,4,5,6,8</sup>, Irina Maljkovic Berry<sup>1</sup>, Jun  
7 Hang<sup>1</sup>

8

9 <sup>1</sup> Viral Diseases Branch, Walter Reed Army Institute for Research, Silver Spring, Maryland,  
10 USA;

11 <sup>2</sup>US Army Medical Research Institute of Infectious Disease Center for Genome Sciences, Ft.  
12 Detrick, Maryland, USA

13 <sup>3</sup>MU Center for Influenza and Emerging Infectious Diseases (CIEID), University of Missouri, Columbia,  
14 Missouri, USA;

15 <sup>4</sup>Department of Molecular Microbiology and Immunology, School of Medicine, University of Missouri,  
16 Columbia, Missouri, USA;

17 <sup>5</sup>Bond Life Sciences Center, University of Missouri, Columbia, Missouri, USA;

18 <sup>6</sup>MU Institute for Data Science and Informatics, University of Missouri, Columbia, Missouri, USA

19 <sup>7</sup>Department of Pathology, School of Medicine, University of Missouri, Columbia, Missouri, USA;

20 <sup>8</sup>Department of Electrical Engineering & Computer Science, College of Engineering, University of  
21 Missouri, Columbia, Missouri, USA

22 Correspondence: Jun.hang.civ@mail.mil; Tel. +1-301-319-9519

23 **ABSTRACT**

24 The long-lasting global COVID-19 pandemic demands timely genomic investigation of SARS-  
25 CoV-2 viruses. Here we report a simple and efficient workflow for whole genome sequencing  
26 utilizing one-step RT-PCR amplification on a microfluidic platform, followed by MiSeq  
27 amplicon sequencing. The method uses Fluidigm IFC and instruments to amplify 48 samples  
28 with 39 pairs of primers in a single step. Application of this method on RNA samples from both  
29 viral isolate and clinical specimens demonstrate robustness and efficiency of this method in  
30 obtaining the full genome sequence of SARS-CoV-2.

## 31 INTRODUCTION

32 Severe acute respiratory syndrome-coronavirus 2 (SARS-CoV-2) (family *Coronaviridae*, genus  
33 *Betacoronavirus*) is responsible for the global pandemic of coronavirus disease 2019 (COVID-  
34 19) (1-4). Since its emergence in Wuhan, China, in November/December 2019, the disease has  
35 rapidly spread worldwide. As of 31 October 2020, there have been over 45 million confirmed  
36 cases, and over one million deaths in 188 countries or regions (<https://coronavirus.jhu.edu/>) (5-  
37 8). In addition to the continuously growing number of SARS-CoV-2 infections, increased  
38 complexity and diversity of disease symptoms are also observed. Despite the large number of  
39 whole genome sequences of SARS-CoV-2 available in GenBank and other public sources, the  
40 unprecedented scale of the viral transmission and the complexity of its pathogenic mechanism  
41 demand more genomic data to be produced using cost-effective and quality-consistent  
42 methodology (9-12).

43 Targeted whole genome amplification and next-generation sequencing (NGS) techniques have  
44 been used in sequencing SARS-CoV-2 genomes (8, 10, 13). In contrast to the high throughput  
45 capacity of NGS, using a conventional multiplexing reverse transcription and polymerase chain  
46 reaction (RT-PCR) procedures to amplify the large 30 Kb viral genomic RNA of SARS-CoV-2  
47 is tedious, technically challenging, and has variable contamination risks. A rapid and streamlined  
48 approach with fewer manual steps to obtain whole genome amplicons suitable for NGS is  
49 desired.

50 In this study, we utilize an integrated microfluidic nucleic acid amplification system (14), custom  
51 primer design, and a one-step RT-PCR program to amplify whole SARS-CoV-2 genomes. After  
52 NGS of the amplicons, an in-house developed bioinformatics pipeline is used to rapidly obtain  
53 genome sequences with graphic summaries for data and results visualization.

54

## 55 MATERIALS AND METHODS

### 56 SARS-CoV-2 RNA samples and quantitative RT-PCR

57 SARS-CoV-2 RNA samples used in this study include RNA extracted from viral isolate R4717  
58 in the US Army Medical Research Institute of Infectious Disease (USAMRIID) and RNA

59 extracted from de-identified clinical respiratory specimens. A one-step RT-qPCR method  
60 targeting RNA dependent RNA polymerase (RdRp) was used to quantify SARS-CoV-2 RNA.  
61 Serially diluted *in vitro* transcripts (IVT), corresponding to nucleotide region 15431 to 15530 of  
62 NC\_045512.2 for strain Wuhan-Hu-1, were prepared and used as real-time RT-PCR standards  
63 for quantification of genome equivalent copy number (GE) of SARS-CoV-2 RNA. Real-time  
64 RT-PCR was performed using the protocol from Carman et al. (15) with SuperScript III one-step  
65 RT-PCR System and Platinum Taq Polymerase. The QuantStudio 7 Flex Real-Time PCR System  
66 and software (ThermoFisher Scientific, Inc.) was used for data acquisition.

### 67 **Whole genome RT-PCR amplification and Illumina sequencing**

68 For whole genome RT-PCR amplification, 35 primer pairs covering the 29903 bp SARS-CoV-2  
69 reference genome (NC\_045512.2) were custom designed by Fluidigm Corporation (South San  
70 Francisco, CA) (Table 1). The RT-PCR products are approximately 1 kb for all amplicons. One-  
71 step RT-PCR amplification was performed using Fluidigm Access Array (AA) nucleic acids  
72 amplification system (Fluidigm Corporation, CA) and SuperScript III one-step RT-qPCR System  
73 with Platinum Taq High Fidelity (ThermoFisher Scientific, Inc.). Four additional pairs of  
74 primers selected from the ARTIC network protocol v3 ([https://www.protocols.io/view/ncov-](https://www.protocols.io/view/ncov-2019-sequencing-protocol-v3-locost-bh42j8ye)  
75 [2019-sequencing-protocol-v3-locost-bh42j8ye](https://www.protocols.io/view/ncov-2019-sequencing-protocol-v3-locost-bh42j8ye)).

76 SARS-CoV-2 R4717 RNA was serially diluted to the concentrations of  $10^6$ ,  $10^5$ ,  $10^4$ ,  $10^3$ ,  $10^2$ ,  
77 10, and 1 GE/ $\mu$ l (genomic equivalence per microliter). For Fluidigm RT-PCR amplification, each  
78 sample well in the Integrated Fluidic Circuit (IFC) chip contained 1.45  $\mu$ l of RNA sample and 4  
79  $\mu$ l of sample mixture solution, consisting of 3  $\mu$ l of 2 $\times$  Reaction Mix, 0.2  $\mu$ l of DMSO, 0.05  $\mu$ l of  
80 RNaseOUT, 0.05  $\mu$ l of SuperScript III RT/Platinum Taq High Fidelity Enzyme Mix, 0.25  $\mu$ l of  
81 20  $\times$  AA Loading Reagent, and 0.7  $\mu$ l of H<sub>2</sub>O. Each well of primer mix contained 6  $\mu$ l of  
82 mixture containing one pair of primers at the final concentration of 4  $\mu$ M for each primer and 2.5  
83 mM MgSO<sub>4</sub> in AA Loading Reagent. The primed IFC chip was loaded into Fluidigm FC1  
84 cycler and amplified using the cycling conditions: 50°C for 30 mins (reverse transcription), 94°C  
85 for 2 mins, 35 cycles of 94°C for 30 secs, 53°C for 30 secs and 68°C for 90 secs, final extension  
86 at 68°C for 7 mins, and kept at 4°C. The RT-PCR products were purified using Agencourt  
87 AMPure XP beads (Beckman Coulter, CA, USA) and then analyzed by using the Agilent

88 Tapestation 4200 System and High Sensitivity DNA D5000 kit (Agilent Technologies, CA,  
89 USA) to determine quality and quantity of the amplicons.

90 The NGS libraries were prepared using Illumina DNA Flex Library kit (Illumina, CA, USA).  
91 DNA was fragmented by tagmentation for 15 mins followed by indexing and library  
92 amplification, with 6 cycles used for 25 ng of amplicon or 12 cycles used for 1-9 ng of amplicon.  
93 The libraries were quantified by using Agilent Tapestation and DNA D5000 kit and then pooled  
94 with equal molar ratio for each library. Pooled libraries were denatured and diluted to a final  
95 concentration of 13.5 pM then sequenced using Illumina MiSeq System and Reagent Kit v3 (600  
96 cycles).

### 97 **Reference genome mapping assembly using ngsmapper program**

98 The full genome of SARS-CoV-2 reference NC\_045512.2 was downloaded from GenBank (16)  
99 and utilized for reference-based genome assembly using the WRAIR viral disease branch in-  
100 house bioinformatics pipeline ngs\_mapper version 1.5.0  
101 ([https://github.com/VDBWRAIR/ngs\\_mapper](https://github.com/VDBWRAIR/ngs_mapper)). This pipeline incorporates a series of quality  
102 control and assembly processes for the fastq sequence reads retrieved from the Illumina MiSeq  
103 and other platforms. These processes includes filtration to drop poorly indexed reads, read  
104 trimming based on quality thresholds using Trimomatic (17), read mapping to the reference  
105 genome using the Burrows-Wheeler Aligner with maximal exact matches (BWA-MEM) (18),  
106 read tagging, variant calling file (VCF) generation using an in-house base caller, read mapping  
107 visualizations, fastq statistic generation, and consensus sequence generation from the VCF  
108 using an in-house script basecaller.py. The pipeline streamlines bioinformatic analysis by  
109 combining multiple tools and consolidating output required for data validation and sequence  
110 curation. A minimum Phred base quality score of 35 and a minimum depth of coverage of 10  
111 were utilized as the configuration parameters for this project. To identify variants present at a  
112 frequency of 20% or higher, an 80/20 ambiguous position threshold was used. The assembled  
113 genomes were further manually curated utilizing bam, consensus and variant calling files  
114 generated from the ngs\_mapper pipeline. Geneious R10 software, integrated genome viewer  
115 (IGV) (19), and MEGA version 7 (20) were used for quality control of ambiguous calls,  
116 insertions, deletions and primer-induced mutations. The genomes were processed to only include  
117 coding sequence regions by clipping the 5' and 3' untranslated regions. MEGA7 was used to

118 align genomes using default parameters with Multiple Sequence Comparison by Log Expectation  
119 (MUSCLE) (21).

120

## 121 **RESULTS**

### 122 **Correlation of Fluidigm RT-PCR yield with amount of input SARS-CoV-2 RNA**

123 Fluidigm RT-PCR whole-genome amplification was done in the Access Array microfluidic chip  
124 using only 1.45  $\mu$ l of RNA input for each sample and with a maximum capacity of 48 samples  
125 and 48 pairs of primers. In this study, a set of 35 primer pairs, i.e. nCOVF/R1-35 in Table 1,  
126 were designed and tested for genome RT-PCR amplification by using serial dilutions of purified  
127 RNA from SARS-CoV-2 isolate R4717. The experiment was done with four replicates processed  
128 in parallel. A single band of amplicons with expected sizes of approximately 1 kb was seen for  
129 all concentrations, with the band intensities correlated with copy numbers of SARS-CoV-2 in the  
130 serial dilutions. The correlation between the concentrations of yielded amplicons and the input  
131 SARS-CoV-2 genome copy numbers (**Figure 1**) was significant with p-value of 3.38E-03.

### 132 **Whole genome coverage and alignment depth of SARS-CoV-2 sequence assembly**

133 MiSeq data for the quadruplicated R4717 RNA serial dilutions described above were assembled  
134 using ngs\_mapper pipeline with SARS-CoV-2 complete genome sequence NC\_045512.2 as the  
135 mapping reference. As expected, genome assembly results correlated well with SARS-CoV-2  
136 copy numbers in each sample. For reactions with  $10^4$  or higher SARS-CoV-2 RNA copies,  
137 complete genome sequences were readily obtained, and importantly, they had uniform coverage  
138 depth across the genome with the peaks matching the regions of amplicon alignment (**Figure 2**).  
139 For reactions with  $10^3$  copies of SARS-CoV-2 RNA, the assembled genome sequences were  
140 nearly complete, except for two small dip/gap at positions 1870-2500 and 16800-17700. The  
141 dip/gap regions were successfully filled by adding two extra primer pairs for each region to the  
142 panel of 35 primer pairs. These additional primers were selected from the ARTIC v3 protocol,  
143 paired to cover the two regions and added into four separate Fluidigm primer wells. In total 39  
144 pairs of primers were applied for whole genome amplification in a single RT-PCR reaction using  
145 Fluidigm nucleic acids amplification system.

## 146 **SARS-CoV-2 genome sequencing of clinical respiratory specimens**

147 This method was subsequently used in genome sequencing of SARS-CoV-2 in RNA extracts  
148 purified from COVID-19 positive nasopharyngeal swabs. The set of 29 samples contained a wide  
149 range of titers, with RT-qPCR Ct values from 13.5 to 33.4 ( $379$  to  $2.72 \times 10^8$  GE/ $\mu$ l) of SARS-  
150 CoV-2. The RT-PCR cDNA yield has significant correlation with viral titers in the Ct range of  
151 20 to 35, with p-value of 1.26E-05. For the samples with Ct values below 20, or exceedingly  
152 high concentrations of  $1.0 \times 10^7$  or greater, RT-PCR yields were substantially lower than  
153 projected (**Figure 3**). Importantly, this observation suggests that severe suppression of PCR  
154 could occur when samples of extremely high titer are used. Nevertheless, full or nearly complete  
155 genome coverage was obtained for all clinical specimens with titers above  $1.0 \times 10^4$  GE/ $\mu$ l, or  
156 approximate Ct value of 29.

## 157 **Comparison of assembled consensus sequences and nucleotide variations**

158 Fluidigm one-step RT-PCR protocol was applied to SARS-CoV-2 RNA of highly varied titers.  
159 For SARS-CoV-2 isolate R4717 RNA 10 $\times$  dilutions (**Figure 1**), a total of 14 full genomes were  
160 assembled and curated. All the full genome consensus sequences were identical except for two  
161 replicates of  $1.0 \times 10^4$  GE/ $\mu$ l. One sample had the ambiguous call Y (T or C) in the alignment  
162 nucleotide position 2105, while the other three replicates had a C. Another sample had a T in  
163 position 23260 while all the other three had the ambiguous call Y. These were the only  
164 ambiguous positions found in the samples, showing low sample diversity at a variant frequency  
165 of 20% or higher. Together this sequencing approach produces high accuracy results.

166

## 167 **DISCUSSION**

168 Even before the disease was named as COVID-19, the sequence was swiftly determined using  
169 next-gen sequencing technologies and SARS-CoV-2 was identified as the causative pathogen for  
170 the emerging acute respiratory disease (5, 22). The first sequence was made publicly available  
171 immediately with a massive number of sequences subsequently generated and shared, which has  
172 greatly facilitated research and development (23-25). All the efforts in developing, improving,  
173 and sharing materials and/or methods has played an essential role in sequence-based  
174 investigations. All the known sequencing protocols use conventional PCR apparatuses with



175 differences in design and selection of primers and reaction parameters. In this study, we applied  
176 one-step RT-PCR protocol on a microfluidic platform (14) to establish a convenient workflow  
177 with throughput, speed, simplicity, consistency, and yield suitable for COVID-19 genome  
178 sequencing. Fluidigm Access Array IFC holds 48 RNA samples (inlets) and 48 primer pairs  
179 (inlets). Steps for mixing sample with primers are obviated, which not only substantially reduces  
180 pipetting manipulation but also effectively mitigates the chance of sample-to-sample cross-  
181 contamination. In this report, we selected 39 primer pairs to obtain even genome coverage. Nine  
182 more individual pairs of primers can be easily added to the panel of 48 primer inlets to quickly  
183 address emerging SARS-CoV-2 genetic divergence. Moreover, the total number of primer pairs  
184 can be further increased without difficulty by pooling together several compatible primer pairs  
185 and adding them into one primer inlet. Each sample is mixed with individual primer pairs in IFC  
186 microfluidic chambers for nano-liter (nl) RT-PCR amplifications in a simplex independent  
187 reaction manner. In contrast, conventional PCR methods often need optimization of primer  
188 pooling and reaction parameters to circumvent primer-to-primer interference and to avoid highly  
189 variable yields among amplicons.

190 Since input RNA samples are partitioned into individual nl reaction chambers to cross-  
191 mix with individual primer pairs, microfluidic applications including Fluidigm IFC require  
192 sufficient genomic copies in order to achieve whole genome amplification. In consequence,  
193 Fluidigm amplification based whole genome sequencing has limitations in sequencing low titer  
194 samples. For RNA samples with 1000 GE/ $\mu$ l or lower concentration, multiplex RT-PCR based  
195 methods or SARS-CoV-2 hybridization-based enrichment method might be a more suitable  
196 choice for whole genome sequencing (26-28). The addition of a first-strand cDNA synthesis step  
197 prior to Fluidigm amplification, with a change of Fluidigm thermocycling program from RT-  
198 PCR to PCR, may help increase genome coverage for low titer samples. Many, if not all,  
199 COVID-19 specimens are tested with quantitative molecular tests and the Ct values or equivalent  
200 titer scores are readily available for deciding whether one-step Fluidigm amplification-based  
201 genome sequencing protocol is appropriate.

202 Using this method, very few sequence assembly errors were observed throughout the  
203 tested SARS-CoV-2 sample genomes. These errors might be due to PCR, sequencing or  
204 basecalling algorithm errors, as well as due to normal fluctuations in the minor variant



205 frequencies between the sample aliquots. When assembled sequences show potentially  
206 significant nucleotide alterations or indels, thorough examination of the data quality processing,  
207 primer trimming, curation of sequence assembly, and detailed laboratory records are needed.  
208 Whenever possible, running replicate samples, repeating the experiment entirely, or using other  
209 methods are important to validate genome variations and minor variants.

210 In conclusion, our study demonstrates a convenient SARS-CoV-2 whole genome  
211 sequencing protocol by incorporating one-step RT-PCR amplification, microfluidic technology,  
212 and next-generation sequencing to achieve a simple and fast workflow with consistent and  
213 quality data. The performance of the protocol was verified using viral isolate RNA and tested by  
214 sequencing clinical respiratory samples of varying viral titers.

215

216 **Funding:** Global Emerging Infections Surveillance and Response System (GEIS), Division of  
217 the Armed Forces Health Surveillance Branch.

218

219 **Acknowledgments:** We thank Mr. James S. Hilaire, Ms. Nicole R. Nicholas, Mr. Tuan K.  
220 Nguyen and Ms. April N. Griggs for their assistance in project management, sample tracking,  
221 storage and retrieval.

222 **Conflicts of Interest:** The authors declare no conflict of interest.

223 **Disclaimer:** Material has been reviewed by the authors' respective institutions. There is no  
224 objection to its presentation and/or publication. The views expressed here are those of the  
225 authors and do not reflect the official policy of the Department of the Army, Department of the  
226 Navy, Department of Defense or U.S. Government. This is the work of U.S. government  
227 employees and may not be copyrighted (17 USC 105).

228

229

230

## 231 **Figure legends**

232

### 233 **Figure 1 Agilent TapeStation analysis of SARS-CoV2 whole genome RT-PCR**

234 **amplification.** **A.** TapeStation profile of RT-PCR products. From *left to right*, 1, 10,  $10^2$ ,  $10^3$ ,  
235  $10^4$ ,  $10^5$ , and  $10^6$  copies of SARS-CoV2 RNA from isolate R4717 were used. **B.** SARS-CoV-2  
236 amplicon concentrations for RT-PCR with serial dilutions of R4717 RNA as inputs. The  
237 concentration values were the average and standard deviation from four replicates.

### 238 **Figure 2 Genome coverage and sequence mapping alignment depth for MiSeq reads data.**

239 SARS-CoV-2 isolate R4717 RNA serial dilutions were subjected to Fluidigm RT-PCR  
240 amplification and MiSeq sequencing. Data were mapped using NC\_045512.2 as reference. **A.**  
241 Genome coverage for  $10\times$  serial dilutions of R4717 RNA from  $1.0E+06$  (*top*) to 1 (*bottom*)  
242 copies. Mapping depth was indicated in colors, *green* for normal (depth  $\geq 10$ ), *cyan* for dip  
243 (depth 1-10), *red* for gap. Results for four replicates were shown. **B.** Sequence mapping graphs  
244 for  $10^6$ ,  $10^5$ ,  $10^4$  and  $10^3$  copies of RNA from one set of serial dilutions.

### 245 **Figure 3 SARS-CoV2 whole genome RT-PCR amplification.**

246 Twenty nine RNA extracts from  
247 COVID-19 positive nasopharyngeal swabs were amplified and sequenced. RT-PCR yield was  
248 quantified by using Agilent TapeStation. Reference mapping coverage was determined by  
mapping MiSeq read data to reference genome sequence NC\_045512.2.

## 249 REFERENCES

- 250 1. Hu B, Guo H, Zhou P, Shi ZL. 2020. Characteristics of SARS-CoV-2 and COVID-19. *Nat Rev*  
251 *Microbiol* doi:10.1038/s41579-020-00459-7.
- 252 2. Hon KL, Leung KKY, Leung AKC, Sridhar S, Qian S, Lee SL, Colin AA. 2020. Overview: The history  
253 and pediatric perspectives of severe acute respiratory syndromes: Novel or just like SARS.  
254 *Pediatr Pulmonol* 55:1584-1591.
- 255 3. Habibzadeh P, Stoneman EK. 2020. The Novel Coronavirus: A Bird's Eye View. *Int J Occup*  
256 *Environ Med* 11:65-71.
- 257 4. Gralinski LE, Menachery VD. 2020. Return of the Coronavirus: 2019-nCoV. *Viruses* 12.
- 258 5. Wang C, Horby PW, Hayden FG, Gao GF. 2020. A novel coronavirus outbreak of global health  
259 concern. *Lancet* 395:470-473.
- 260 6. Lu R, Zhao X, Li J, Niu P, Yang B, Wu H, Wang W, Song H, Huang B, Zhu N, Bi Y, Ma X, Zhan F,  
261 Wang L, Hu T, Zhou H, Hu Z, Zhou W, Zhao L, Chen J, Meng Y, Wang J, Lin Y, Yuan J, Xie Z, Ma J,  
262 Liu WJ, Wang D, Xu W, Holmes EC, Gao GF, Wu G, Chen W, Shi W, Tan W. 2020. Genomic  
263 characterisation and epidemiology of 2019 novel coronavirus: implications for virus origins and  
264 receptor binding. *Lancet* 395:565-574.
- 265 7. Fauver JR, Petrone ME, Hodcroft EB, Shioda K, Ehrlich HY, Watts AG, Vogels CBF, Brito AF, Alpert  
266 T, Muyombwe A, Razeq J, Downing R, Cheemarla NR, Wyllie AL, Kalinich CC, Ott IM, Quick J,  
267 Loman NJ, Neugebauer KM, Greninger AL, Jerome KR, Roychoudhury P, Xie H, Shrestha L, Huang  
268 ML, Pitzer VE, Iwasaki A, Omer SB, Khan K, Bogoch, II, Martinello RA, Foxman EF, Landry ML,  
269 Neher RA, Ko AI, Grubaugh ND. 2020. Coast-to-Coast Spread of SARS-CoV-2 during the Early  
270 Epidemic in the United States. *Cell* 181:990-996.e5.
- 271 8. Worobey M, Pekar J, Larsen BB, Nelson MI, Hill V, Joy JB, Rambaut A, Suchard MA, Wertheim JO,  
272 Lemey P. 2020. The emergence of SARS-CoV-2 in Europe and North America. *Science*  
273 doi:10.1126/science.abc8169.
- 274 9. Rockett RJ, Arnott A, Lam C, Sadsad R, Timms V, Gray KA, Eden JS, Chang S, Gall M, Draper J, Sim  
275 EM, Bachmann NL, Carter I, Basile K, Byun R, O'Sullivan MV, Chen SC, Maddocks S, Sorrell TC,  
276 Dwyer DE, Holmes EC, Kok J, Prokopenko M, Sintchenko V. 2020. Revealing COVID-19  
277 transmission in Australia by SARS-CoV-2 genome sequencing and agent-based modeling. *Nat*  
278 *Med* 26:1398-1404.
- 279 10. Oude Munnink BB, Nieuwenhuijse DF, Stein M, O'Toole Á, Haverkate M, Mollers M, Kamga SK,  
280 Schapendonk C, Pronk M, Lexmond P, van der Linden A, Bestebroer T, Chestakova I, Overmars  
281 RJ, van Nieuwkoop S, Molenkamp R, van der Eijk AA, GeurtsvanKessel C, Vennema H, Meijer A,  
282 Rambaut A, van Dissel J, Sikkema RS, Timen A, Koopmans M. 2020. Rapid SARS-CoV-2 whole-  
283 genome sequencing and analysis for informed public health decision-making in the Netherlands.  
284 *Nat Med* 26:1405-1410.
- 285 11. Licastro D, Rajasekharan S, Dal Monego S, Segat L, D'Agaro P, Marcello A. 2020. Isolation and  
286 Full-Length Genome Characterization of SARS-CoV-2 from COVID-19 Cases in Northern Italy. *J*  
287 *Viro* 94.
- 288 12. Islam MR, Hoque MN, Rahman MS, Alam A, Akther M, Puspo JA, Akter S, Sultana M, Crandall KA,  
289 Hossain MA. 2020. Genome-wide analysis of SARS-CoV-2 virus strains circulating worldwide  
290 implicates heterogeneity. *Sci Rep* 10:14004.
- 291 13. Stefanelli P, Faggioni G, Lo Presti A, Fiore S, Marchi A, Benedetti E, Fabiani C, Anselmo A,  
292 Ciammaruconi A, Fortunato A, De Santis R, Fillo S, Capobianchi MR, Gismondo MR, Ciervo A,  
293 Rezza G, Castrucci MR, Lista F, On Behalf Of Iss Covid-Study G. 2020. Whole genome and  
294 phylogenetic analysis of two SARS-CoV-2 strains isolated in Italy in January and February 2020:  
295 additional clues on multiple introductions and further circulation in Europe. *Euro Surveill* 25.

- 296 14. Wang M, Escudero-Ibarz L, Moody S, Zeng N, Clipson A, Huang Y, Xue X, Grigoropoulos NF,  
297 Barrans S, Worrillow L, Forshew T, Su J, Firth A, Martin H, Jack A, Brugger K, Du MQ. 2015.  
298 Somatic Mutation Screening Using Archival Formalin-Fixed, Paraffin-Embedded Tissues by  
299 Fluidigm Multiplex PCR and Illumina Sequencing. *J Mol Diagn* 17:521-32.
- 300 15. Corman VM, Landt O, Kaiser M, Molenkamp R, Meijer A, Chu DK, Bleicker T, Brunink S, Schneider  
301 J, Schmidt ML, Mulders DG, Haagmans BL, van der Veer B, van den Brink S, Wijsman L, Goderski  
302 G, Romette JL, Ellis J, Zambon M, Peiris M, Goossens H, Reusken C, Koopmans MP, Drosten C.  
303 2020. Detection of 2019 novel coronavirus (2019-nCoV) by real-time RT-PCR. *Euro Surveill* 25.  
304 16. Wu F, Zhao S, Yu B, Chen YM, Wang W, Song ZG, Hu Y, Tao ZW, Tian JH, Pei YY, Yuan ML, Zhang  
305 YL, Dai FH, Liu Y, Wang QM, Zheng JJ, Xu L, Holmes EC, Zhang YZ. 2020. A new coronavirus  
306 associated with human respiratory disease in China. *Nature* 579:265-269.
- 307 17. Bolger AM, Lohse M, Usadel B. 2014. Trimmomatic: a flexible trimmer for Illumina sequence  
308 data. *Bioinformatics* 30:2114-20.
- 309 18. Li H, Durbin R. 2009. Fast and accurate short read alignment with Burrows-Wheeler transform.  
310 *Bioinformatics* 25:1754-60.
- 311 19. Robinson JT, Thorvaldsdottir H, Winckler W, Guttman M, Lander ES, Getz G, Mesirov JP. 2011.  
312 Integrative genomics viewer. *Nat Biotechnol* 29:24-6.
- 313 20. Kumar S, Stecher G, Tamura K. 2016. MEGA7: Molecular Evolutionary Genetics Analysis Version  
314 7.0 for Bigger Datasets. *Mol Biol Evol* 33:1870-4.
- 315 21. Edgar RC. 2004. MUSCLE: multiple sequence alignment with high accuracy and high throughput.  
316 *Nucleic Acids Res* 32:1792-7.
- 317 22. Eurosurveillance Editorial T. 2020. Note from the editors: novel coronavirus (2019-nCoV). *Euro*  
318 *Surveill* 25.
- 319 23. Corman VM, Muller MA, Costabel U, Timm J, Binger T, Meyer B, Kreher P, Lattwein E, Eschbach-  
320 Bludau M, Nitsche A, Bleicker T, Landt O, Schweiger B, Drexler JF, Osterhaus AD, Haagmans BL,  
321 Dittmer U, Bonin F, Wolff T, Drosten C. 2012. Assays for laboratory confirmation of novel human  
322 coronavirus (hCoV-EMC) infections. *Euro Surveill* 17.
- 323 24. Nalla AK, Casto AM, Huang MW, Perchetti GA, Sampoleo R, Shrestha L, Wei Y, Zhu H, Jerome KR,  
324 Greninger AL. 2020. Comparative Performance of SARS-CoV-2 Detection Assays Using Seven  
325 Different Primer-Probe Sets and One Assay Kit. *J Clin Microbiol* 58.
- 326 25. Yuan M, Wu NC, Zhu X, Lee CD, So RTY, Lv H, Mok CKP, Wilson IA. 2020. A highly conserved  
327 cryptic epitope in the receptor binding domains of SARS-CoV-2 and SARS-CoV. *Science* 368:630-  
328 633.
- 329 26. Itokawa K, Sekizuka T, Hashino M, Tanaka R, Kuroda M. 2020. Disentangling primer interactions  
330 improves SARS-CoV-2 genome sequencing by multiplex tiling PCR. *PLoS One* 15:e0239403.
- 331 27. Paden CR, Tao Y, Queen K, Zhang J, Li Y, Uehara A, Tong S. 2020. Rapid, Sensitive, Full-Genome  
332 Sequencing of Severe Acute Respiratory Syndrome Coronavirus 2. *Emerg Infect Dis* 26:2401-  
333 2405.
- 334 28. Nasir JA, Kozak RA, Aftanas P, Raphenya AR, Smith KM, Maguire F, Maan H, Alruwaili M,  
335 Banerjee A, Mbareche H, Alcock BP, Knox NC, Mossman K, Wang B, Hiscox JA, McArthur AG,  
336 Mubareka S. 2020. A Comparison of Whole Genome Sequencing of SARS-CoV-2 Using Amplicon-  
337 Based Sequencing, Random Hexamers, and Bait Capture. *Viruses* 12.

338

339

340 **Table 1** Primers for RT-PCR amplification of SARS-CoV-2 genome using Fluidigm system

| Forward Primer    | Forward Primer Sequence      | Reverse Primer     | Reverse Primer Sequence   | Amplicon Length | From  | To    |
|-------------------|------------------------------|--------------------|---------------------------|-----------------|-------|-------|
| nCoV1             | TTCCCAGGTAAACCAACCA          | nCoV1              | AGGTGCTGCAATTCATAGCTCTT   | 1011            | 17    | 1027  |
| nCoV2             | CCGAACAACCTGGACTTTATTGACAC   | nCoV2              | GCCTTCTGTAAACACGCACAGA    | 1048            | 912   | 1959  |
| nCoV3             | ACTGAGTCTCTTTATGCATTTG       | nCoV3              | AGCATCTGCCACAACACA        | 1048            | 1852  | 2899  |
| nCoV32            | AGAAGAACTGGCCTACTCATGC       | nCoV32             | ACATTGGCTGCATTAAACAACCAC  | 1017            | 2937  | 3953  |
| nCoV33            | TTTGGAAATTTGGTGCCACTTCTG     | nCoV33             | CCTCTTGAACAACATCACCCTACT  | 1004            | 3642  | 4645  |
| nCoV4             | AGAGTTTGTGTAGACTGTTCG        | nCoV4              | TATAGGAACCAGCAAGTGAGATG   | 1048            | 3752  | 4799  |
| nCoV5             | GTTTCTGTTTCTCACCTGATGC       | nCoV5              | TGGTGTGCATCATAACAAAAG     | 1008            | 4688  | 5695  |
| nCoV6             | CCTGTACGTGTGGTAAACAAGC       | nCoV6              | GCTAAACCATGAGTAGCAAGGGT   | 1028            | 5621  | 6648  |
| nCoV7             | TACAGAAGAGGTTGGCCACACAG      | nCoV7              | TGTACATTCGACTCTTGTGTCT    | 1015            | 6523  | 7537  |
| nCoV8             | ATGTGCATGTTGTAGACGGTTGT      | nCoV8              | GCAGCACTAGTATTGTTTTCGT    | 1009            | 7455  | 8463  |
| nCoV9             | GCAGGTAGCAAAAAGTCACAACA      | nCoV9              | AGATGCTGATATGTCAAAGCAC    | 1036            | 8368  | 9403  |
| nCoV10            | GGAGTTTCTGTGGTGTAGATGC       | nCoV10             | AGGTGCTTAGGATTGGCTGTAT    | 1041            | 9311  | 10351 |
| nCoV11            | TCTAAGTTGCGTAGTGTATGCT       | nCoV11             | TCCAGTTTGAGCAGAAAGAGGTC   | 994             | 9835  | 10828 |
| nCoV12            | GTTTGTTCGCATTCAACCAGGAC      | nCoV12             | ACACTCTCAGCACCATCATCA     | 1031            | 10360 | 11390 |
| nCoV34            | ATATGCTGCTAGTTGGGTGATG       | nCoV34             | CTGCATCACGGTCAAATTCAGAT   | 1026            | 11726 | 12751 |
| nCoV35            | GCCTCAGAGTTTGTCCCTTCC        | nCoV35             | ATTAGTGATTGGTTGCCCCAC     | 1047            | 12598 | 13644 |
| nCoV13            | AAGCTGGAATGCAACAGAAGTG       | nCoV13             | TTTCGCATGGCATCAGAAATTG    | 1011            | 13023 | 14033 |
| nCoV14            | TGTAGAAAACCCAGATATATTACGC    | nCoV14             | ATTTGTCTAGTTTGTGACGATG    | 1007            | 13935 | 14941 |
| nCoV15            | TTGATTGTTACGATGGTGGCTGT      | nCoV15             | AGGTACACATAATCATACCCTG    | 1048            | 14879 | 15926 |
| nCoV16            | TGCTGAAGCAAAATGTTGGACT       | nCoV16             | CAACAGCATCACCATAGTCACCT   | 1044            | 15821 | 16864 |
| nCoV-2019_54_LEFT | TGAGTTAACAGGACACATGTTAGACA   | nCoV-2019_56_RIGHT | ACACTATGCGAGCAGAAAGGGTA   | 1033            | 16119 | 17152 |
| nCoV-2019_55_LEFT | ACTCAACTTTACTTAGGAGGTATGAGCT | nCoV-2019_57_RIGHT | GTAATTTGAGCAGGGTCGCCAAT   | 1035            | 16417 | 17452 |
| nCoV17            | ACCTAGACCACCACTTAACCGAA      | nCoV17             | CAGCTTTTCTCAAGCAGGGTTA    | 1016            | 16749 | 17764 |
| nCoV-2019_56_LEFT | ACCTAGACCACCACTTAACCGA       | nCoV-2019_59_RIGHT | AAGAGTCTGTACATTTTCAGCTTG  | 1313            | 16749 | 18062 |
| nCoV-2019_58_LEFT | TGATTTGAGTGTGTCAATGCCAGA     | nCoV-2019_60_RIGHT | GGTACCAACAGTCTCTAGTAGC    | 966             | 17382 | 18348 |
| nCoV18            | GCTTAAAGCACATAAAGACAAATCA    | nCoV18             | GTGCGCTCAGGTCTATTTT       | 1041            | 17616 | 18656 |
| nCoV19            | GTCTTATGGGCACATGGCTTTGA      | nCoV19             | AGCCACATTTCTAAACTCTGAAGTC | 1050            | 18589 | 19638 |
| nCoV20            | ACATGATGATCTCAGCTGGCTTT      | nCoV20             | TCACCTTGACAACCTTAGAACTACA | 1047            | 19535 | 20581 |
| nCoV21            | TTGGAGAAGCCGTAAAAACACAG      | nCoV21             | TTTATAGCCACGGAACCTCCAAG   | 1045            | 20123 | 21167 |
| nCoV22            | TTTAAGACAGTGGTTCCTACGG       | nCoV22             | GGACTGGGTCTTCAATCTAAAGT   | 1001            | 20910 | 21910 |
| nCoV23            | TAAGGGTACTGCTGTTATGTCTT      | nCoV23             | TCAAGTGCACAGTCTACAGCATC   | 1025            | 21419 | 22443 |
| nCoV24            | GGGTTATCTTCAACTAGGACTT       | nCoV24             | ACATCTGATAAAGAACAGCAAC    | 1044            | 22363 | 23406 |
| nCoV25            | ACAATTTGGCAGAGACATTGCTG      | nCoV25             | AAACCTATAAGCCATTTGCATAGC  | 1030            | 23251 | 24280 |
| nCoV26            | CGGGTACAATCACTTCTGTTGG       | nCoV26             | ACTATGGCAATCAAGCCAGCTAT   | 1048            | 24198 | 25245 |
| nCoV27            | TTCAAAAAGAAATTGACCGCCTC      | nCoV27             | CCGTCGATTGTGTAATTTGGAC    | 1047            | 25098 | 26144 |
| nCoV28            | ACATGTTACCTTCTCATCTACA       | nCoV28             | GACTGTATGCAGCAAAACCTG     | 1045            | 26070 | 27114 |
| nCoV29            | GTGACATCAAGGACCTGCCTAAA      | nCoV29             | ATAGGACACGGGTCACTCACTACAT | 1012            | 26998 | 28009 |
| nCoV30            | CTGTAGCTGCATTTACCAAGAA       | nCoV30             | CAAGCTGGTTCAATCTGTCAAGC   | 1037            | 27928 | 28964 |
| nCoV31            | GAACTTCTCTGCTAGAATGGC        | nCoV31             | TCACATGGGGATAGCACTAC      | 961             | 28884 | 29844 |

341

342

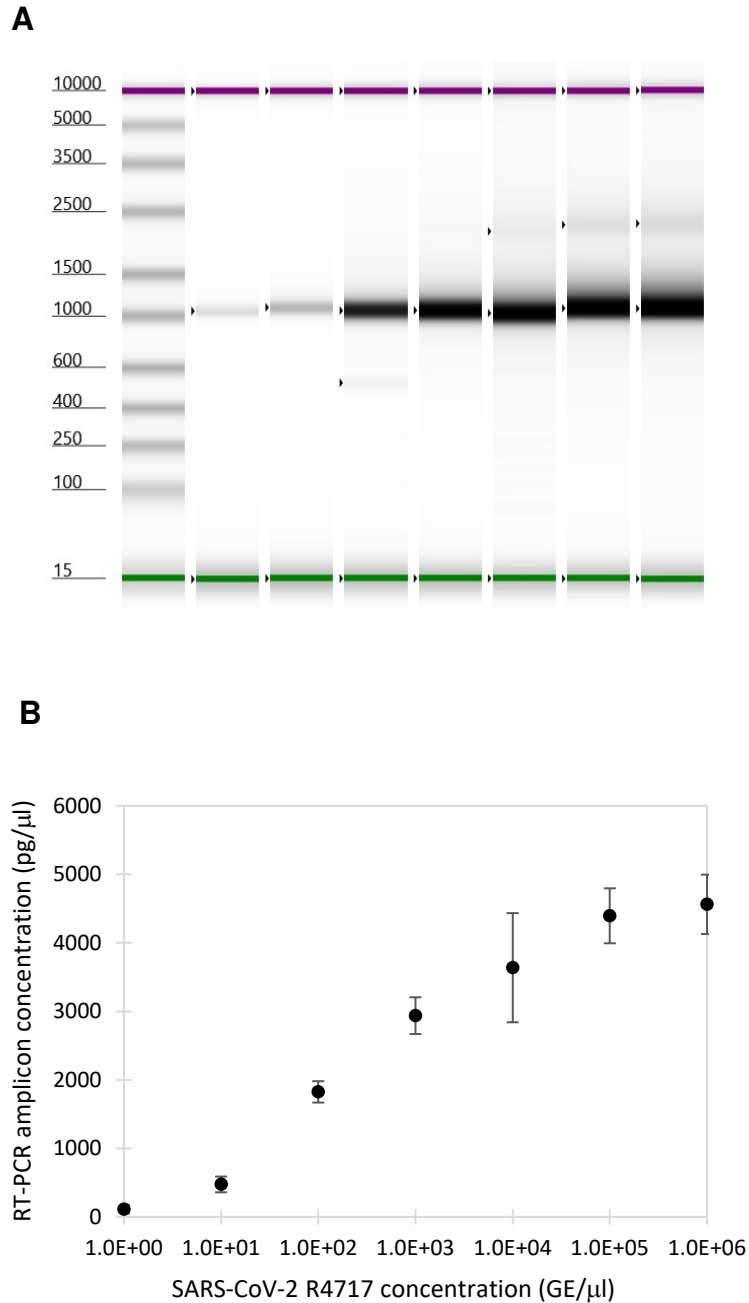

**Figure 1 Agilent TapeStation analysis of SARS-CoV2 whole genome RT-PCR amplification.** **A.** TapeStation profile of RT-PCR products. From *left to right*, 1, 10,  $10^2$ ,  $10^3$ ,  $10^4$ ,  $10^5$ , and  $10^6$  copies of SARS-CoV2 RNA from isolate R4717 were used. **B.** SARS-CoV-2 amplicon concentrations for RT-PCR with serial dilutions of R4717 RNA as inputs. The concentration values were the average and standard deviation from four replicates.

**A**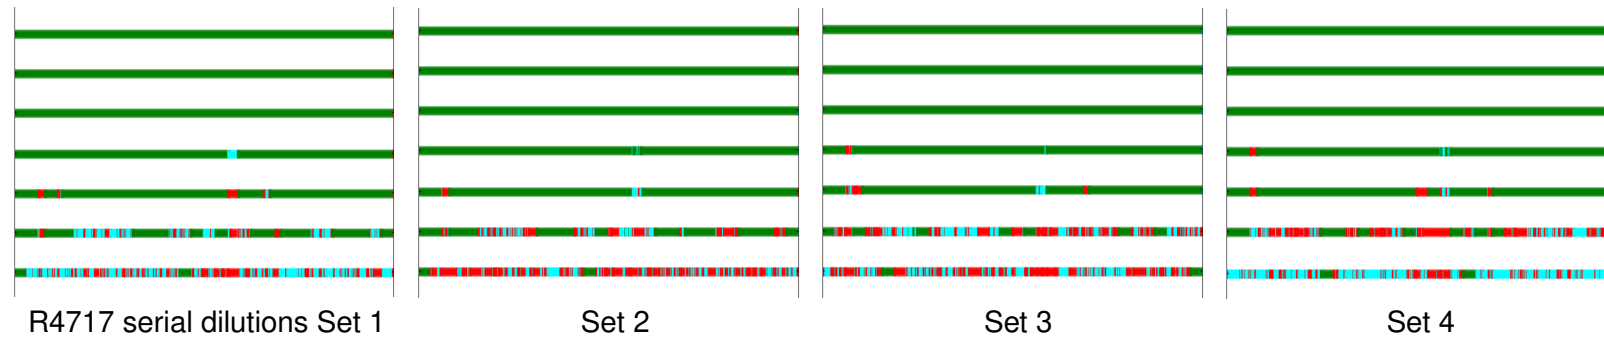**B**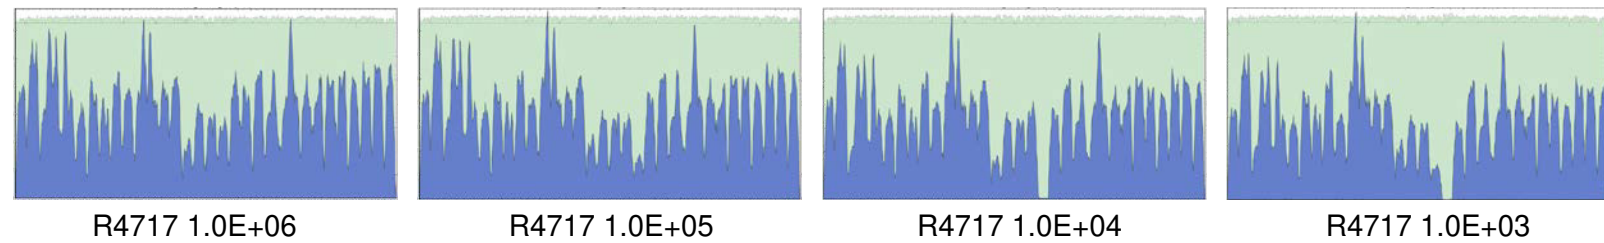

**Figure 2 Genome coverage and sequence mapping alignment depth for MiSeq reads data.** SARS-CoV-2 isolate R4717 RNA serial dilutions were subjected to Fluidigm RT-PCR amplification and MiSeq sequencing. Data were mapped using NC\_045512.2 as reference. **A.** Genome coverage for 10× serial dilutions of R4717 RNA from 1.0E+06 (*top*) to 1 (*bottom*) copies. Mapping depth was indicated in colors, *green* for normal (depth  $\geq 10$ ), *cyan* for dip (depth 1-10), *red* for gap. Results for four replicates were shown. **B.** Sequence mapping graphs for  $10^6$ ,  $10^5$ ,  $10^4$  and  $10^3$  copies of RNA from one set of serial dilutions.



**A**

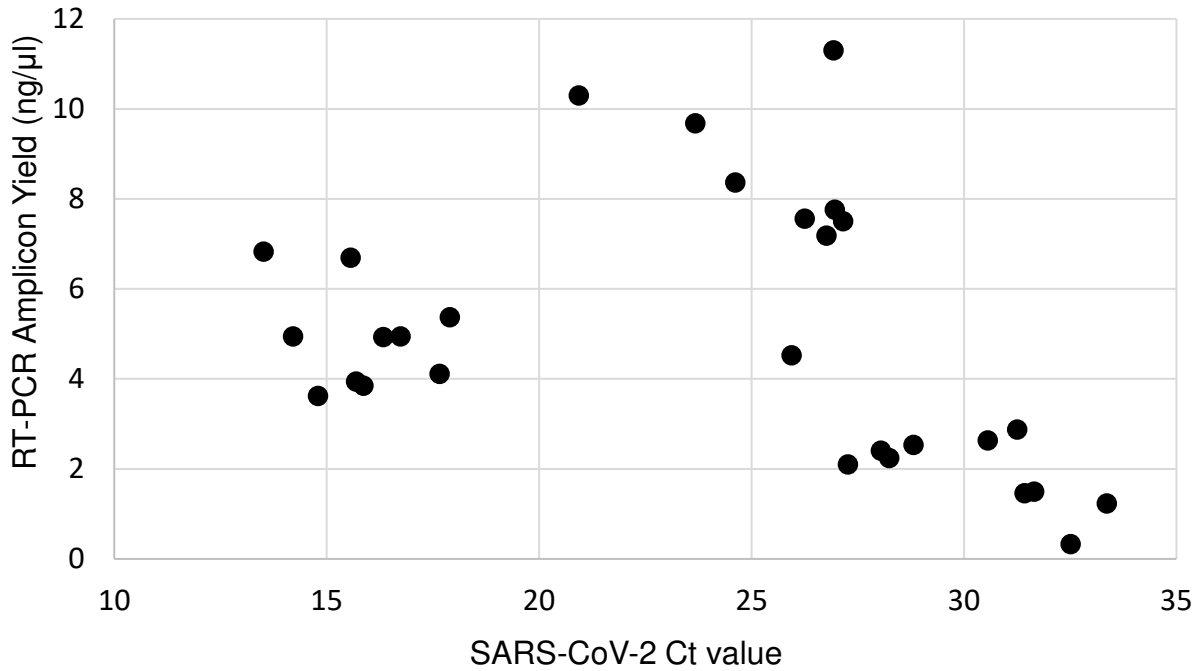

**B**

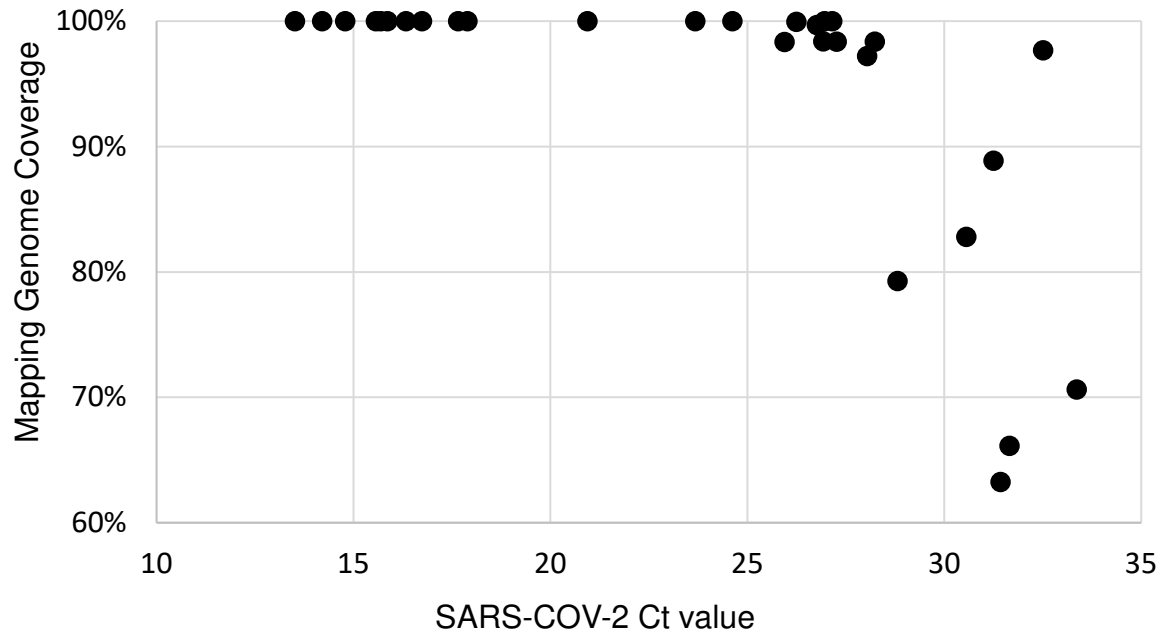

**Figure 3 SARS-CoV2 whole genome RT-PCR amplification.** Twenty nine RNA extracts from COVID-19 positive nasopharyngeal swabs were amplified and sequenced. RT-PCR yield was quantified by using Agilent TapeStation. Reference mapping coverage was determined by mapping MiSeq read data to reference genome sequence NC\_045512.2.
